# Supplementary material for: Consumer Perceptions of Food Packaging in Its Role in Fighting Food Waste
Source: MDPI journal article supplement (doi:10.3390/su15031917), 2023-01-19
Supplement: s1 [file s1]

## Supplementary File S1

Alternative hypotheses and their corresponding statistical tests conducted in Minitab 19.

| Alternative Hypotheses                                                                                                                                                                                                                 | Statistical Tests (with references)                                                                                                     |
|----------------------------------------------------------------------------------------------------------------------------------------------------------------------------------------------------------------------------------------|-----------------------------------------------------------------------------------------------------------------------------------------|
| <b>H1</b> There are differences between consumer perceptions when considering packaging and its role in reducing food waste across demographic profiles of gender, age, residential state, living arrangements, education, and income. | Principal Component Analysis (Appendix 2)<br>PCA Clustered Groups Matrix (Figure 1)<br>Tabled Results: Descriptive Statistics (Table 1) |
| <b>H2</b> There are differences between consumers' rating of food waste and food packaging's perceived environmental impact.                                                                                                           | One-Way ANOVA with Tukey Post-hoc Comparisons (Appendix 3)<br>Graphed Results: Interval Plots (Figure 2)                                |
| <b>H3</b> There are differences between consumers' motivational levels to reduce household food waste across demographic profiles and opinions on whether packaging reduces food waste.                                                | ANOVA General Linear Model (Appendix 4)<br>Graphed Results: Main Effects Plot (Figure 3)                                                |
| <b>H4</b> Consumers' level of concern over food waste and its environmental impact relates to their perceived value of packaging as a strategy to reduce food waste.                                                                   | ANOVA General Linear Model (Appendix 4)<br>Tabled Results: (Table 2)                                                                    |
