# Supplementary material for: Consumer Perceptions of Food Packaging in Its Role in Fighting Food Waste
Source: MDPI journal article supplement (doi:10.3390/su15031917), 2023-01-19
Supplement: s1 [file s1]

## Supplementary File S4

Minitab 19: ANOVA general linear model results ( $n = 965$ ), consumer perceptions of food waste environmental issue impacting their perceived value of save food packaging

**General Linear Model: Environmental Issue of Food Waste versus Gender, Age, State, Living Arrangement, Education, Income, Motivation to Reduce Food Waste, Packaging Reduces Food Waste, Total Rate of Packaging, Total Efficiency Packaging Rating, Environmental Issue of Packaging Waste**

### Method

Factor coding      (-1, 0, +1)

### Factor Information

| Factor                                 | Type  | Levels | Values                                           |
|----------------------------------------|-------|--------|--------------------------------------------------|
| Gender                                 | Fixed | 2      | Female, Male                                     |
| Age                                    | Fixed | 6      | 18 - 25, 26 - 35, 36 - 45, 46 - 55, 56 - 65, 66+ |
| State                                  | Fixed | 8      | ACT, NSW, NT, QLD, SA, TAS, VIC, WA              |
| Living Arrangement                     | Fixed | 5      | 1, 2, 3, 4, 5                                    |
| Education                              | Fixed | 5      | 1, 2, 3, 4, 5                                    |
| Income                                 | Fixed | 5      | 1, 2, 3, 4, 5                                    |
| Motivation to Reduce Food Waste        | Fixed | 5      | 1, 2, 3, 4, 5                                    |
| Packaging Reduces Food Waste           | Fixed | 5      | 1, 2, 3, 4, 5                                    |
| Total Rate of Packaging                | Fixed | 5      | 1, 2, 3, 4, 5                                    |
| Total Efficiency of Packaging Rating   | Fixed | 5      | 1, 2, 3, 4, 5                                    |
| Environmental Issue of Packaging Waste | Fixed | 5      | 1, 2, 3, 4, 5                                    |

### Analysis of Variance

| Source             | D F | Seq SS | Contribution | Adj SS | Adj MS  | F-Value | P-Value |
|--------------------|-----|--------|--------------|--------|---------|---------|---------|
| Gender             | 1   | 9.33   | 0.79%        | 5.205  | 5.2052  | 5.66    | 0.018   |
| Age                | 5   | 38.47  | 3.26%        | 52.719 | 10.5438 | 11.46   | 0.000   |
| State              | 7   | 8.45   | 0.72%        | 6.511  | 0.9302  | 1.01    | 0.422   |
| Living Arrangement | 4   | 1.69   | 0.14%        | 1.977  | 0.4942  | 0.54    | 0.708   |

|                                        |             |         |         |         |         |       |       |
|----------------------------------------|-------------|---------|---------|---------|---------|-------|-------|
| Education                              | 4           | 6.68    | 0.57%   | 4.410   | 1.1026  | 1.20  | 0.310 |
| Income                                 | 4           | 2.42    | 0.21%   | 2.328   | 0.5819  | 0.63  | 0.639 |
| Motiv_ReduceWaste                      | 4           | 68.86   | 5.84%   | 21.573  | 5.3933  | 5.86  | 0.000 |
| Packaging Reduces Food Waste           | 4           | 20.62   | 1.75%   | 15.275  | 3.8188  | 4.15  | 0.002 |
| Total Rate of Packaging                | 4           | 8.96    | 0.76%   | 0.695   | 0.1737  | 0.19  | 0.944 |
| Total Efficiency of Packaging Rating   | 4           | 13.51   | 1.15%   | 1.859   | 0.4647  | 0.51  | 0.732 |
| Environmental Issue of Packaging Waste | 4           | 155.34  | 13.17%  | 155.336 | 38.8340 | 42.22 | 0.000 |
| Error                                  | 9<br>1<br>9 | 845.32  | 71.66%  | 845.324 | 0.9198  |       |       |
| Lack-of-Fit                            | 9<br>1<br>2 | 841.32  | 71.32%  | 841.324 | 0.9225  | 1.61  | 0.260 |
| Pure Error                             | 7           | 4.00    | 0.34%   | 4.000   | 0.5714  |       |       |
| Total                                  | 9<br>6<br>4 | 1179.65 | 100.00% |         |         |       |       |

#### Model Summary

| S        | R-sq   | R-sq(adj) | PRESS | R-sq(pred) | AICc    | BIC     |
|----------|--------|-----------|-------|------------|---------|---------|
| 0.959078 | 28.34% | 24.83%    | *     | *          | 2709.70 | 2933.77 |

#### Coefficients

| Term     | Coef    | SE Coef | 95% CI             | T-Value | P-Value | VIF  |
|----------|---------|---------|--------------------|---------|---------|------|
| Constant | 2.723   | 0.229   | (2.274, 3.172)     | 11.90   | 0.000   |      |
| Gender   |         |         |                    |         |         |      |
| Female   | 0.0818  | 0.0344  | (0.0143, 0.1493)   | 2.38    | 0.018   | 1.13 |
| Male     | -0.0818 | 0.0344  | (-0.1493, -0.0143) | -2.38   | 0.018   | *    |
| Age      |         |         |                    |         |         |      |
| 18 - 25  | 0.3567  | 0.0836  | (0.1927, 0.5208)   | 4.27    | 0.000   | 1.94 |
| 26 - 35  | 0.2194  | 0.0660  | (0.0899, 0.3489)   | 3.33    | 0.001   | 1.63 |
| 36 - 45  | 0.1178  | 0.0676  | (-0.0148, 0.2503)  | 1.74    | 0.082   | 1.67 |
| 46 - 55  | 0.0515  | 0.0750  | (-0.0958, 0.1988)  | 0.69    | 0.493   | 1.74 |
| 56 - 65  | -0.3318 | 0.0768  | (-0.4825, -0.1811) | -4.32   | 0.000   | 1.76 |
| 66+      | -0.4136 | 0.0810  | (-0.5725, -0.2547) | -5.11   | 0.000   | *    |
| State    |         |         |                    |         |         |      |
| ACT      | -0.152  | 0.165   | (-0.476, 0.173)    | -0.92   | 0.359   | 3.35 |
| NSW      | -0.0003 | 0.0668  | (-0.1315, 0.1308)  | -0.00   | 0.996   | 1.70 |

|                   |         |        |                    |       |       |      |
|-------------------|---------|--------|--------------------|-------|-------|------|
| NT                | -0.193  | 0.166  | (-0.518, 0.132)    | -1.17 | 0.244 | 3.35 |
| QLD               | 0.0393  | 0.0774 | (-0.1127, 0.1912)  | 0.51  | 0.612 | 1.75 |
| SA                | 0.204   | 0.129  | (-0.050, 0.458)    | 1.58  | 0.115 | 2.47 |
| TAS               | -0.129  | 0.164  | (-0.450, 0.191)    | -0.79 | 0.429 | 3.27 |
| VIC               | 0.1041  | 0.0735 | (-0.0401, 0.2482)  | 1.42  | 0.157 | 1.73 |
| WA                | 0.127   | 0.103  | (-0.075, 0.328)    | 1.24  | 0.217 | *    |
| LivArrange        |         |        |                    |       |       |      |
| 1                 | 0.0681  | 0.0672 | (-0.0638, 0.2001)  | 1.01  | 0.311 | 1.44 |
| 2                 | -0.0151 | 0.0818 | (-0.1756, 0.1453)  | -0.19 | 0.853 | 1.55 |
| 3                 | -0.0577 | 0.0686 | (-0.1924, 0.0770)  | -0.84 | 0.401 | 1.40 |
| 4                 | 0.0424  | 0.0565 | (-0.0685, 0.1533)  | 0.75  | 0.454 | 1.36 |
| 5                 | -0.0377 | 0.0851 | (-0.2047, 0.1294)  | -0.44 | 0.658 | *    |
| Education         |         |        |                    |       |       |      |
| 1                 | 0.0593  | 0.0943 | (-0.1258, 0.2443)  | 0.63  | 0.530 | 3.73 |
| 2                 | -0.0279 | 0.0663 | (-0.1579, 0.1022)  | -0.42 | 0.674 | 2.70 |
| 3                 | 0.120   | 0.102  | (-0.080, 0.320)    | 1.18  | 0.239 | 4.03 |
| 4                 | -0.1401 | 0.0669 | (-0.2715, -0.0087) | -2.09 | 0.037 | 2.77 |
| 5                 | -0.0114 | 0.0584 | (-0.1261, 0.1034)  | -0.19 | 0.846 | *    |
| Income            |         |        |                    |       |       |      |
| 1                 | 0.1057  | 0.0866 | (-0.0643, 0.2757)  | 1.22  | 0.223 | 1.59 |
| 2                 | 0.0070  | 0.0629 | (-0.1164, 0.1304)  | 0.11  | 0.911 | 1.35 |
| 3                 | -0.0131 | 0.0550 | (-0.1211, 0.0949)  | -0.24 | 0.812 | 1.17 |
| 4                 | -0.0944 | 0.0689 | (-0.2297, 0.0409)  | -1.37 | 0.171 | 1.31 |
| 5                 | -0.0053 | 0.0945 | (-0.1908, 0.1802)  | -0.06 | 0.955 | *    |
| Motiv_ReduceWaste |         |        |                    |       |       |      |
| 1                 | -0.0226 | 0.0747 | (-0.1692, 0.1240)  | -0.30 | 0.762 | 2.15 |
| 2                 | 0.0448  | 0.0619 | (-0.0768, 0.1664)  | 0.72  | 0.470 | 1.86 |
| 3                 | -0.2858 | 0.0645 | (-0.4124, -0.1593) | -4.43 | 0.000 | 2.02 |
| 4                 | 0.1067  | 0.0668 | (-0.0244, 0.2377)  | 1.60  | 0.110 | 1.95 |
| 5                 | 0.1570  | 0.0624 | (0.0345, 0.2794)   | 2.52  | 0.012 | *    |
| Pack_ReduceFW     |         |        |                    |       |       |      |
| 1                 | 0.126   | 0.118  | (-0.104, 0.357)    | 1.07  | 0.283 | 2.54 |
| 2                 | -0.1883 | 0.0711 | (-0.3278, -0.0488) | -2.65 | 0.008 | 1.63 |
| 3                 | -0.1385 | 0.0584 | (-0.2531, -0.0238) | -2.37 | 0.018 | 1.54 |
| 4                 | -0.0296 | 0.0614 | (-0.1501, 0.0910)  | -0.48 | 0.631 | 1.57 |
| 5                 | 0.2301  | 0.0817 | (0.0697, 0.3905)   | 2.82  | 0.005 | *    |

#### TotalRatePack

|   |         |        |                   |       |       |      |
|---|---------|--------|-------------------|-------|-------|------|
| 1 | -0.033  | 0.302  | (-0.626, 0.560)   | -0.11 | 0.913 | 8.43 |
| 2 | 0.013   | 0.115  | (-0.212, 0.238)   | 0.11  | 0.911 | 2.55 |
| 3 | -0.0268 | 0.0938 | (-0.2109, 0.1573) | -0.29 | 0.775 | 3.48 |
| 4 | -0.0258 | 0.0915 | (-0.2054, 0.1538) | -0.28 | 0.778 | 3.53 |
| 5 | 0.073   | 0.126  | (-0.174, 0.319)   | 0.58  | 0.564 | *    |

#### TotalEffPackRating

|   |        |       |                 |       |       |        |
|---|--------|-------|-----------------|-------|-------|--------|
| 1 | -0.508 | 0.835 | (-2.147, 1.131) | -0.61 | 0.543 | 109.11 |
| 2 | 0.109  | 0.348 | (-0.575, 0.793) | 0.31  | 0.754 | 20.25  |
| 3 | 0.119  | 0.227 | (-0.326, 0.564) | 0.52  | 0.600 | 24.66  |
| 4 | 0.082  | 0.224 | (-0.359, 0.522) | 0.36  | 0.717 | 30.95  |
| 5 | 0.199  | 0.227 | (-0.248, 0.645) | 0.87  | 0.383 | *      |

#### EnvIssue\_PackagingWaste

|   |        |        |                  |       |       |       |
|---|--------|--------|------------------|-------|-------|-------|
| 1 | -1.209 | 0.282  | (-1.762, -0.655) | -4.29 | 0.000 | 21.80 |
| 2 | -0.516 | 0.132  | (-0.775, -0.257) | -3.92 | 0.000 | 6.17  |
| 3 | 0.2056 | 0.0965 | (0.0162, 0.3949) | 2.13  | 0.033 | 5.54  |
| 4 | 0.5167 | 0.0909 | (0.3383, 0.6952) | 5.68  | 0.000 | 6.34  |
| 5 | 1.0025 | 0.0893 | (0.8272, 1.1777) | 11.23 | 0.000 | *     |

### Regression Equation

$$\begin{aligned}
 \text{Environmental Issue of Food Waste} = & 2.723 + 0.0818 \text{ Gender\_Female} - 0.0818 \text{ Gender\_Male} + 0.3567 \text{ Age\_18 - 25} \\
 & + 0.2194 \text{ Age\_26 - 35} + 0.1178 \text{ Age\_36 - 45} + 0.0515 \text{ Age\_46 - 55} \\
 & - 0.3318 \text{ Age\_56 - 65} - 0.4136 \text{ Age\_66+} - 0.152 \text{ State\_ACT} \\
 & - 0.0003 \text{ State\_NSW} - 0.193 \text{ State\_NT} + 0.0393 \text{ State\_QLD} + 0.204 \text{ State\_SA} \\
 & - 0.129 \text{ State\_TAS} + 0.1041 \text{ State\_VIC} + 0.127 \text{ State\_WA} \\
 & + 0.0681 \text{ LivArrange\_1} - 0.0151 \text{ LivArrange\_2} - 0.0577 \text{ LivArrange\_3} \\
 & + 0.0424 \text{ LivArrange\_4} - 0.0377 \text{ LivArrange\_5} + 0.0593 \text{ Education\_1} \\
 & - 0.0279 \text{ Education\_2} + 0.120 \text{ Education\_3} - 0.1401 \text{ Education\_4} \\
 & - 0.0114 \text{ Education\_5} + 0.1057 \text{ Income\_1} + 0.0070 \text{ Income\_2} \\
 & - 0.0131 \text{ Income\_3} - 0.0944 \text{ Income\_4} - 0.0053 \text{ Income\_5} \\
 & - 0.0226 \text{ Motiv\_ReduceWaste\_1} + 0.0448 \text{ Motiv\_ReduceWaste\_2} \\
 & - 0.2858 \text{ Motiv\_ReduceWaste\_3} + 0.1067 \text{ Motiv\_ReduceWaste\_4} \\
 & + 0.1570 \text{ Motiv\_ReduceWaste\_5} + 0.126 \text{ Pack\_ReduceFW\_1} \\
 & - 0.1883 \text{ Pack\_ReduceFW\_2} - 0.1385 \text{ Pack\_ReduceFW\_3} \\
 & - 0.0296 \text{ Pack\_ReduceFW\_4} + 0.2301 \text{ Pack\_ReduceFW\_5} \\
 & - 0.033 \text{ TotalRatePack\_1} + 0.013 \text{ TotalRatePack\_2} - 0.0268 \text{ TotalRatePack\_3} \\
 & - 0.0258 \text{ TotalRatePack\_4} + 0.073 \text{ TotalRatePack\_5} \\
 & - 0.508 \text{ TotalEffPackRating\_1} + 0.109 \text{ TotalEffPackRating\_2} \\
 & + 0.119 \text{ TotalEffPackRating\_3} + 0.082 \text{ TotalEffPackRating\_4} \\
 & + 0.199 \text{ TotalEffPackRating\_5} - 1.209 \text{ EnvIssue\_PackagingWaste\_1} \\
 & - 0.516 \text{ EnvIssue\_PackagingWaste\_2} + 0.2056 \text{ EnvIssue\_PackagingWaste\_3} \\
 & + 0.5167 \text{ EnvIssue\_PackagingWaste\_4} + 1.0025 \text{ EnvIssue\_PackagingWaste\_5}
 \end{aligned}$$

### Means

| Term               | Fitted Mean | SE Mean |
|--------------------|-------------|---------|
| Gender             |             |         |
| Female             | 2.805       | 0.229   |
| Male               | 2.641       | 0.234   |
| Age                |             |         |
| 18 - 25            | 3.080       | 0.244   |
| 26 - 35            | 2.943       | 0.241   |
| 36 - 45            | 2.841       | 0.239   |
| 46 - 55            | 2.775       | 0.240   |
| 56 - 65            | 2.392       | 0.237   |
| 66+                | 2.310       | 0.245   |
| State              |             |         |
| ACT                | 2.572       | 0.287   |
| NSW                | 2.723       | 0.226   |
| NT                 | 2.530       | 0.289   |
| QLD                | 2.763       | 0.234   |
| SA                 | 2.927       | 0.265   |
| TAS                | 2.594       | 0.290   |
| VIC                | 2.827       | 0.233   |
| WA                 | 2.850       | 0.250   |
| Living Arrangement |             |         |
| 1                  | 2.791       | 0.234   |
| 2                  | 2.708       | 0.246   |
| 3                  | 2.666       | 0.240   |
| 4                  | 2.766       | 0.232   |
| 5                  | 2.686       | 0.248   |
| Education          |             |         |
| 1                  | 2.783       | 0.254   |
| 2                  | 2.695       | 0.236   |
| 3                  | 2.843       | 0.253   |
| 4                  | 2.583       | 0.238   |
| 5                  | 2.712       | 0.229   |
| Income             |             |         |
| 1                  | 2.829       | 0.247   |
| 2                  | 2.730       | 0.232   |
| 3                  | 2.710       | 0.231   |

|                                        |       |       |
|----------------------------------------|-------|-------|
| 4                                      | 2.629 | 0.238 |
| 5                                      | 2.718 | 0.256 |
| Motiv_ReduceWaste                      |       |       |
| 1                                      | 2.701 | 0.241 |
| 2                                      | 2.768 | 0.238 |
| 3                                      | 2.437 | 0.238 |
| 4                                      | 2.830 | 0.240 |
| 5                                      | 2.880 | 0.233 |
| Packaging Reduces Food Waste           |       |       |
| 1                                      | 2.850 | 0.265 |
| 2                                      | 2.535 | 0.238 |
| 3                                      | 2.585 | 0.233 |
| 4                                      | 2.694 | 0.232 |
| 5                                      | 2.953 | 0.244 |
| Total Rate of Packaging                |       |       |
| 1                                      | 2.690 | 0.427 |
| 2                                      | 2.736 | 0.244 |
| 3                                      | 2.697 | 0.226 |
| 4                                      | 2.697 | 0.225 |
| 5                                      | 2.796 | 0.235 |
| Total Efficiency of Pack Rating        |       |       |
| 1                                      | 2.22  | 1.02  |
| 2                                      | 2.832 | 0.359 |
| 3                                      | 2.842 | 0.129 |
| 4                                      | 2.805 | 0.130 |
| 5                                      | 2.922 | 0.146 |
| Environmental Issue of Packaging Waste |       |       |
| 1                                      | 1.515 | 0.358 |
| 2                                      | 2.207 | 0.277 |
| 3                                      | 2.929 | 0.248 |
| 4                                      | 3.240 | 0.245 |
| 5                                      | 3.726 | 0.241 |

---
