# Supplementary material for: Consumer Perceptions of Food Packaging in Its Role in Fighting Food Waste
Source: MDPI journal article supplement (doi:10.3390/su15031917), 2023-01-19
Supplement: s1 [file s1]

## Supplementary File S2

Minitab 19: Multivariate principal component analysis (PCA) output results ( $n = 965$ ) showing 10 factors and their corresponding definitions

The results are inclusive of the Eigenanalysis of the correlation matrix, Eigenvectors table reporting the first 7 principal components that cumulatively contribute to approximately 90% of the variance. Discussed here within is the first 4 principal components that contribute 69% of the total variance.

| Principal Component Analysis Factor Definitions |                                                                       |                    |
|-------------------------------------------------|-----------------------------------------------------------------------|--------------------|
| No.                                             | Multivariants: Research Questions (measured on a likert-scale)        | Factors            |
| 1                                               | Packaging helps to reduce food waste                                  | Pack_ReduceFW      |
| 2                                               | I am concerned about food packaging waste                             | Pack_WasteConcern  |
| 3                                               | Packaging is not required for fresh food                              | Pack_No4Fresh      |
| 4                                               | I refuse to buy products in unnecessary amounts of packaging          | Pack_No2Unneces    |
| 5                                               | I buy fresh food packaged, rather than loose                          | Pack_Yes2Fresh     |
| 6                                               | I actively search out products in biodegradable/compostable packaging | Pack_Yes2Biodeg    |
| 7                                               | I look for packaging that is recyclable                               | Pack_Yes2Recycle   |
| 8                                               | I buy refill packs wherever possible                                  | Pack_Yes2Refill    |
| 9                                               | I bring my own refillable containers/bags and buy products unpacked   | Pack_Yes2BYO       |
| 10                                              | I buy food in packaging that suits my needs                           | Pack_Yes2SuitNeeds |

### Eigenanalysis of the Correlation Matrix

|            |       |       |       |       |       |       |       |       |       |       |
|------------|-------|-------|-------|-------|-------|-------|-------|-------|-------|-------|
| Eigenvalue | 3.613 | 1.691 | 0.818 | 0.770 | 0.703 | 0.603 | 0.562 | 0.518 | 0.410 | 0.308 |
|            | 4     | 1     | 3     | 3     | 5     | 0     | 8     | 3     | 8     | 3     |
| Proportion | 0.361 | 0.169 | 0.082 | 0.077 | 0.070 | 0.060 | 0.056 | 0.052 | 0.041 | 0.031 |
| Cumulative | 0.361 | 0.530 | 0.612 | 0.689 | 0.760 | 0.820 | 0.876 | 0.928 | 0.969 | 1.000 |

### Eigenvectors

| Variable          | PC1    | PC2    | PC3    | PC4    | PC5    | PC6    | PC7    |
|-------------------|--------|--------|--------|--------|--------|--------|--------|
| Pack_ReduceFW     | 0.099  | 0.527  | -0.139 | 0.641  | -0.209 | 0.122  | -0.445 |
| Pack_WasteConcern | 0.313  | -0.337 | -0.081 | 0.430  | 0.160  | -0.112 | -0.034 |
| Pack_No4Fresh     | 0.205  | -0.454 | -0.448 | 0.290  | -0.341 | -0.214 | 0.309  |
| Pack_No2Unneces   | 0.414* | -0.067 | 0.114  | -0.093 | 0.150  | -0.081 | -0.280 |
| Pack_Yes2Fresh    | 0.185  | 0.535  | 0.047  | 0.169  | 0.226  | -0.229 | 0.717  |
| Pack_Yes2Biodeg   | 0.432* | 0.056  | 0.232  | -0.050 | 0.199  | -0.082 | -0.075 |
| Pack_Yes2Recycle  | 0.424* | -0.075 | 0.142  | -0.101 | 0.229  | -0.208 | -0.162 |

|                    |       |        |        |        |        |        |        |
|--------------------|-------|--------|--------|--------|--------|--------|--------|
| Pack_Yes2Refill    | 0.355 | -0.006 | -0.277 | -0.109 | 0.125  | 0.853  | 0.189  |
| Pack_Yes2BYO       | 0.309 | 0.025  | 0.502  | -0.091 | -0.760 | 0.099  | 0.145  |
| Pack_Yes2SuitNeeds | 0.238 | 0.322  | -0.596 | -0.500 | -0.235 | -0.282 | -0.154 |
