# Supplementary material for: Consumer Perceptions of Food Packaging in Its Role in Fighting Food Waste
Source: MDPI journal article supplement (doi:10.3390/su15031917), 2023-01-19
Supplement: s1 [file s1]

### Supplementary File S3

#### Minitab 19: One-way ANOVA output results ( $n = 965$ ) with Tukey's post-hoc comparisons

Means comparison of consumers rating of Food Waste and Packaging Waste as an environmental issue.

*Environmental Issues (Packaging Waste Vs Food Waste) rated on a 5-point Likert Scale*

| Analysis of Variance                                    | Mean | Standard deviation | <i>n</i> |
|---------------------------------------------------------|------|--------------------|----------|
| 1= Not an environmental issue                           | 1.78 | 1.56               | 9        |
| 2= Small issue                                          | 2.33 | 0.99               | 51       |
| 3= Moderate issue                                       | 2.99 | 0.78               | 189      |
| 4= Large issue                                          | 3.32 | 0.89               | 308      |
| 5= Extreme environmental issue                          | 3.87 | 1.16               | 408      |
| ANOVA for PackagingWaste: F (4,960) = 50.2, $P = 0.000$ |      |                    |          |

*Tukey's post hoc comparisons*

| Comparison of levels | Estimate | Difference in means 95% confidence interval <sup>†</sup> | <i>P</i> -value |
|----------------------|----------|----------------------------------------------------------|-----------------|
| 2-1                  | 0.56     | (-0.44, 1.55)                                            | 0.547           |
| 3-1                  | 1.22     | (0.28, 2.16)                                             | 0.004**         |
| 4-1                  | 1.55     | (0.62, 2.48)                                             | 0.000***        |
| 5-1                  | 2.09     | (1.17, 3.02)                                             | 0.000***        |
| 3-2                  | 0.66     | (0.23, 1.10)                                             | 0.000***        |
| 4-2                  | 0.99     | (0.58, 1.41)                                             | 0.000***        |
| 5-2                  | 1.54     | (1.13, 1.95)                                             | 0.000***        |
| 4-3                  | 0.33     | (0.08, 0.58)                                             | 0.004***        |
| 5-3                  | 0.88     | (0.63, 1.12)                                             | 0.000***        |
| 5-4                  | 0.08     | (0.34, 0.75)                                             | 0.000***        |

<sup>†</sup> Estimated using Tukey's HSD

Sig = Statistical Significance Rating: \*  $P$ -value < 0.005; \*\*  $P$ -value < 0.01; \*\*\*  $P$ -value < 0.001;
